# Supplementary material for: Human melanoma-specific CD8+ T-cells from metastases are capable of antigen-specific degranulation and cytolysis directly ex vivo
Source: PubMed Central journal article supplement — Oncoimmunology. 2012 Jul 1;1(4):467–530. doi: 10.4161/onci.19856 (PMC3382891; doi:10.4161/onci.19856), 2012-07-01
Supplement: onci-1-467-s01.pdf [file onci-1-467-s01.pdf]

Table S1. Differences between original LCA and mLCA

|                                                                    | LCA                                                | mLCA                                              |
|--------------------------------------------------------------------|----------------------------------------------------|---------------------------------------------------|
| <i>Effector cells</i>                                              |                                                    |                                                   |
| <i>Type</i>                                                        | FACS purified Ag-specific CD8 <sup>+</sup> T-cells | Total CD8 <sup>+</sup> T-cells                    |
| <i>no. Ag-sp cells</i>                                             | 31-1000                                            | 3383                                              |
| <i>no. total CD8<sup>+</sup> T-cells</i>                           | 31-1000                                            | 30000-10 <sup>7</sup> a)                          |
| <i>Target cells</i>                                                | 125 or 250 specific<br>+125 or 250 irrelevant      | 220-56388                                         |
| <i>Experiment set-up</i>                                           | Specific and irrelevant targets in a single well   | Specific and irrelevant targets in separate wells |
| <i>Brefeldin A</i>                                                 | No                                                 | After 1h of co-incubation                         |
| <i>Read-out</i>                                                    |                                                    |                                                   |
| <i>Cytotoxicity</i>                                                | Yes                                                | Yes                                               |
| <i>Degranulation (CD107a)</i>                                      | Yes                                                | Yes                                               |
| <i>Cytokine production</i>                                         | Yes, in supernatant by CBA                         | Yes, per cell by ICS                              |
| depending on the frequency of Ag-specific CD8 <sup>+</sup> T-cells |                                                    |                                                   |

Table S2. Frequency and phenotype of Melan-A-specific CD8<sup>+</sup> T- cells from PBMC and TILN of study subjects

|                                  |               |             | PBMC <sup>c)</sup> | TILN <sup>c)</sup> | <i>p</i> -value |
|----------------------------------|---------------|-------------|--------------------|--------------------|-----------------|
| % Melan-A specific <sup>a)</sup> |               |             | 1.7±1.2            | 3.9±4.4            | 0.14            |
|                                  | <u>CD45RA</u> | <u>CCR7</u> |                    |                    |                 |
| Nv <sup>b)</sup>                 | +             | +           | 3.1±3.3            | 1±1                | 0.31            |
| CM <sup>b)</sup>                 | -             | +           | 4.7±6              | 0.7±0.6            | 0.29            |
| EM <sup>b)</sup>                 | -             | -           | 77.1±11.8          | 95±4.6             | 0.03            |
| EMRA <sup>b)</sup>               | +             | -           | 15.4±14            | 3±3.6              | 0.17            |

within CD8<sup>+</sup> T-cells

within Melan-A-specific CD8<sup>+</sup> T-cells; Nv – naïve, CM – Central Memory, EM – Effector Memory, EMRA – Effector Memory CD45RA<sup>+</sup> cells

mean ± s.d.
